# Supplementary material
Source: PubMed Central journal article supplement (PMC4547861)
Supplement: NIHMS690992-supplement-01.pdf [file NIHMS690992-supplement-01.pdf]

| Supplemental Table S1: Questions used to assess moderate and vigorous physical activity                                                                                                                                                                                                        |                                                                                                                                                                                                                                                                                                                                                                                                                                             |
|------------------------------------------------------------------------------------------------------------------------------------------------------------------------------------------------------------------------------------------------------------------------------------------------|---------------------------------------------------------------------------------------------------------------------------------------------------------------------------------------------------------------------------------------------------------------------------------------------------------------------------------------------------------------------------------------------------------------------------------------------|
| NYC Community Health Survey Questions, 2010 and 2012                                                                                                                                                                                                                                           | Los Angeles County Health Survey Questions, 2011                                                                                                                                                                                                                                                                                                                                                                                            |
| How often do you do vigorous leisure-time physical activities for at least 10 minutes that cause heavy sweating or large increases in breathing or heart rate? READ IF NEEDED: How many times per day, per week, per month or per year do you do these activities?                             | VIGOROUS exercises or activities are those that require hard physical effort and cause heavy sweating and large increases in breathing and heart rate (for example, running or aerobics). In a usual week, do you do vigorous exercise or activities for at least 10 minutes at a time without stopping? This can include vigorous activity you do while at work.                                                                           |
| About how long do you do these vigorous leisure-time physical activities each time? READ IF NEEDED: For how many minutes or hours do you do these activities each time?                                                                                                                        | On an average day when you do these VIGOROUS ACTIVITIES for at least 10 minutes at a time, how much TOTAL time do you spend doing these activities?                                                                                                                                                                                                                                                                                         |
| How often do you do light or moderate leisure-time physical activities for at least 10 minutes that cause only light sweating or a slight to moderate increase in breathing or heart rate? READ IF NEEDED: How many times per day, per week, per month or per year do you do these activities? | Next, we are asking about MODERATE exercises or activities, those that cause light sweating, and slight increases in breathing and heart rate (for example, walking, yard work or physical labor at work). In a usual week, do you WALK OR DO MODERATE EXERCISE OR ACTIVITIES for at least 10 minutes at a time without stopping? This can include moderate activity at (If Q17n=1 OR 2, read: "work or") home, for recreation or exercise. |
| About how long do you do these light to moderate leisure-time physical activities each time? READ IF NEEDED: For how many minutes or hours do you do these activities each time?                                                                                                               | How many days per week do you WALK OR DO MODERATE EXERCISE OR PHYSICAL ACTIVITIES for at least 10 minutes without stopping?                                                                                                                                                                                                                                                                                                                 |
|                                                                                                                                                                                                                                                                                                | On an average day when you WALK OR DO MODERATE EXERCISE OR PHYSICAL ACTIVITIES for at least 10 minutes without stopping, how much TOTAL time do you spend doing these activities?                                                                                                                                                                                                                                                           |



|                         |      |              |        |          |               |      |      |              |        |          |              |        |
|-------------------------|------|--------------|--------|----------|---------------|------|------|--------------|--------|----------|--------------|--------|
| U.S. Born               | 63.8 | (47.8, 77.2) | <0.001 | 3.67     | (1.18, 11.44) | 0.02 | 72.6 | (65.2, 78.9) | <0.001 | 3.28     | (1.77, 6.07) | <0.001 |
| Foreign Born‡           | 35.4 | (30.4, 40.6) | Ref    | Referent |               |      | 49.3 | (43.8, 54.7) | Ref    | Referent |              |        |
| Language Spoken at Home |      |              |        |          |               |      |      |              |        |          |              |        |
| English                 | 62.8 | (53.4, 71.4) | <0.001 | 1.50     | (0.79, 2.84)  | 0.21 | 61.9 | (55.3, 68)   | 0.10   | 0.89     | (0.51, 1.55) | 0.67   |
| Non-English             | 26.8 | (22, 32.2)   | Ref    | Referent |               | Ref  | 50.3 | (44, 56.6)   | Ref    | Referent |              |        |

\*Estimate's Relative Standard Error (a measure of estimate precision) is greater than 30% or the sample size is less than 50, making the estimate potentially unreliable.

\*\*Odds ratios are adjusted for all other covariates in the table

^Education is restricted to those 25 years of age and older.

‡Foreign born includes individuals born in Puerto Rico and other U.S. Territories.

Supplemental Table S3: Characteristics of Asian Americans, New York City  
Community Health Survey 2012 and Los Angeles County Health Survey 2012

|                             | NYC |            | Los Angeles |            |
|-----------------------------|-----|------------|-------------|------------|
|                             | n   | weighted % | n           | weighted % |
| Overall                     | 805 | 100        | 785         | 100.0      |
| Age Group                   |     |            |             |            |
| 18-24                       | 68  | 16.5       | 68          | 15.0       |
| 25-44                       | 277 | 42.0       | 240         | 35.4       |
| 45-64                       | 289 | 28.7       | 317         | 34.4       |
| 65+                         | 170 | 12.8       | 160         | 15.1       |
| Sex                         |     |            |             |            |
| Male                        | 396 | 50.5       | 325         | 51.2       |
| Female                      | 409 | 49.5       | 460         | 48.8       |
| Poverty/Income <sup>†</sup> |     |            |             |            |
| <200%                       | 414 | 54.0       | 243         | 36.1       |
| 200-399%                    | 94  | 12.2       | 226         | 31.1       |
| 400+%                       | 197 | 20.6       | 316         | 32.8       |
| Education <sup>^</sup>      |     |            |             |            |
| Less than High School       | 193 | 31.4       | 69          | 11.3       |
| Grade 12 or GED             | 151 | 23.0       | 88          | 17.9       |
| Some college                | 79  | 10.7       | 122         | 23.3       |
| College graduate            | 311 | 35.0       | 428         | 47.4       |
| Insurance Type              |     |            |             |            |
| Private                     | 317 | 36.1       | 486         | 60.1       |
| Public                      | 335 | 40.9       | 179         | 24.2       |
| Uninsured                   | 120 | 20.3       | 98          | 15.6       |
| Other                       | 13  | 2.7        | n/a         |            |
| Asian Subgroup              |     |            |             |            |
| Chinese                     | 479 | 64.5       | 276         | 36.2       |
| Korean                      | 148 | 19.2       | 100         | 15.6       |
| Filipino                    | 33  | 3.5        | 130         | 21.1       |
| South Asian                 | 25  | 3.5        | 58          | 9.6        |
| Vietnamese                  | 12  | 1.1        | 62          | 9.5        |
| Japanese                    | 6   | 0.6        | 85          | 7.9        |
| Nativity                    |     |            |             |            |
| U.S. Born                   | 80  | 9.4        | 239         | 28.7       |
| Foreign Born <sup>‡</sup>   | 722 | 90.6       | 540         | 71.3       |
| In US for <10 years         | 148 | 30.5       | 92          | 26.0       |
| In US for ≥10 years         | 571 | 69.5       | 447         | 74.0       |
| Language Spoken at Home     |     |            |             |            |
| English                     | 267 | 31.4       | 389         | 47.1       |
| Non-English                 | 535 | 68.6       | 396         | 52.9       |

\*Estimate's Relative Standard Error (a measure of estimate precision) is greater than 30% or the sample size is less than 50, making the estimate potentially unreliable.

<sup>†</sup>Poverty status as "unknown" is part of denominator but not reported here. Hence percentages do not sum to 100%.

<sup>^</sup>Education is restricted to those 25 years of age and older.

<sup>‡</sup>Foreign born includes individuals born in Puerto Rico and other U.S. Territories.
